# Supplementary material
Source: PubMed Central journal article supplement (PMC2265194)

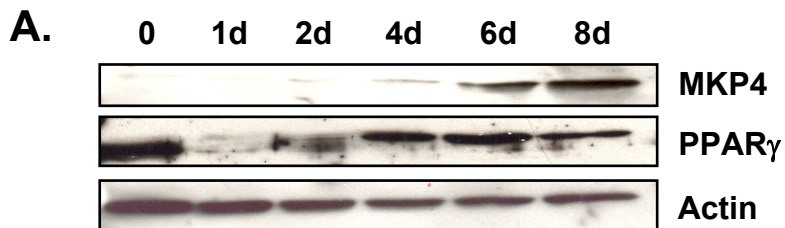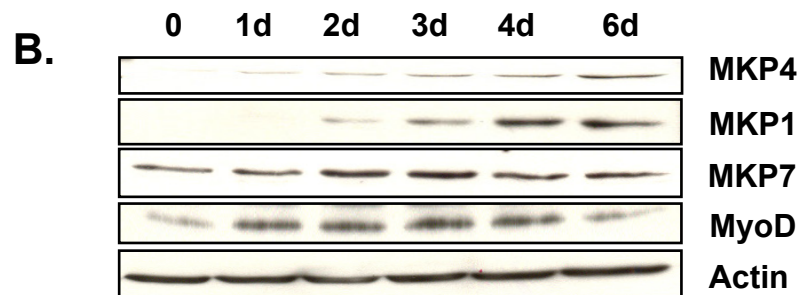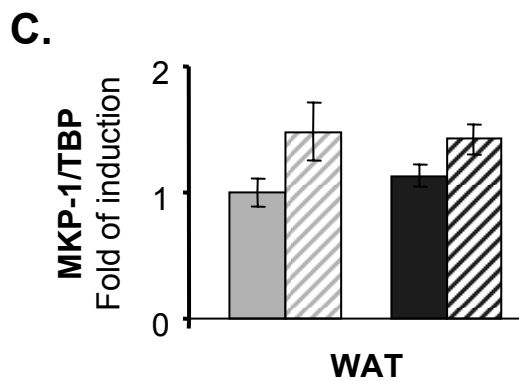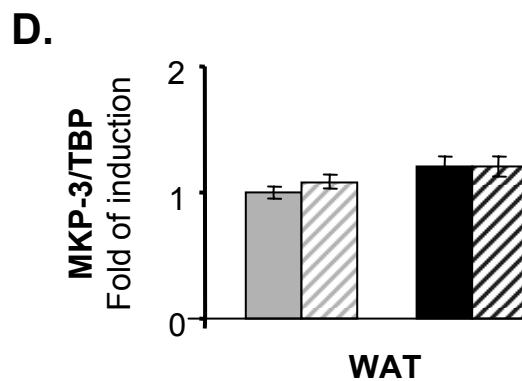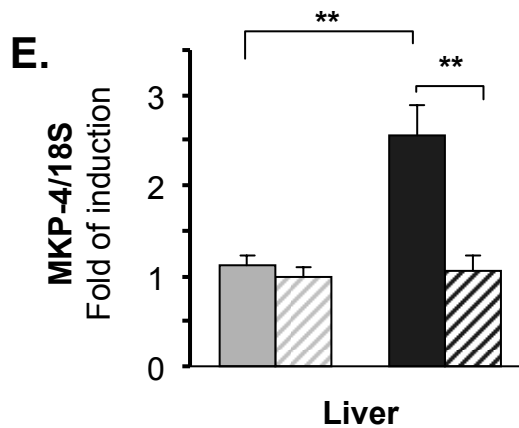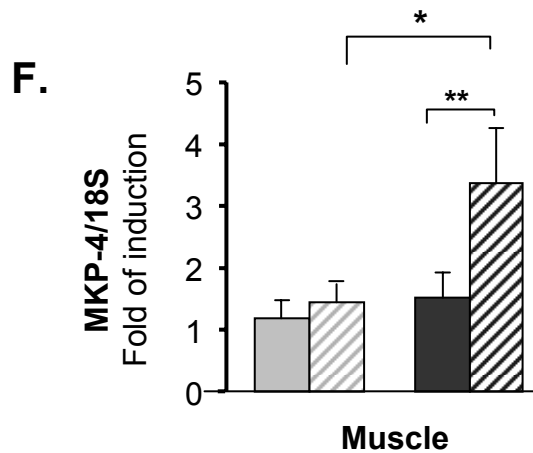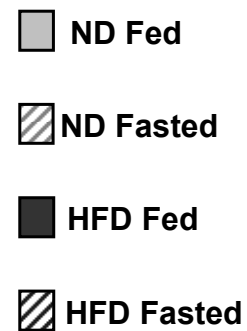

Supplement: pnas_0712275105_1.pdf [file pnas_0712275105_1.pdf]

**A.**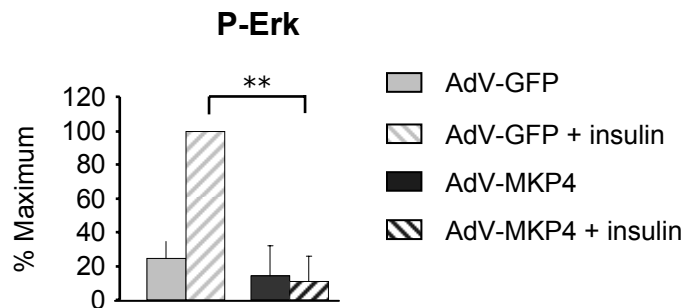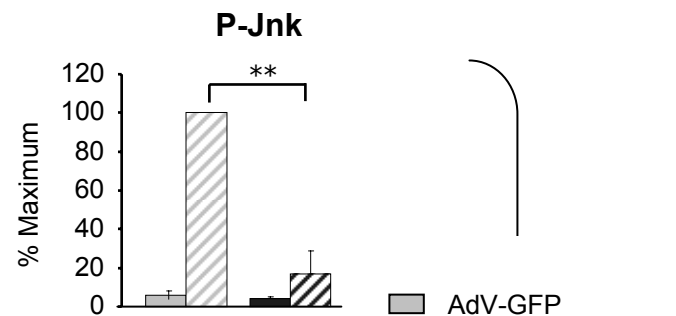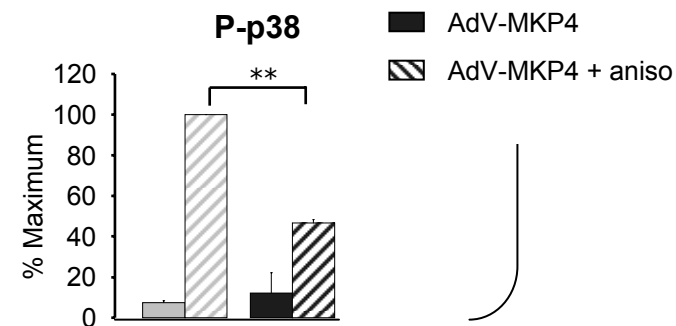

\* p&lt;0.05, \*\* p&lt;0.01, n=3

**B.**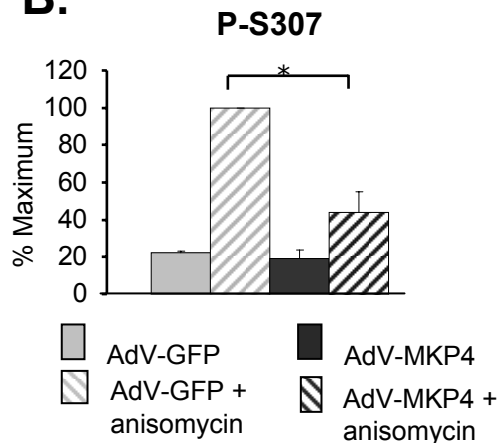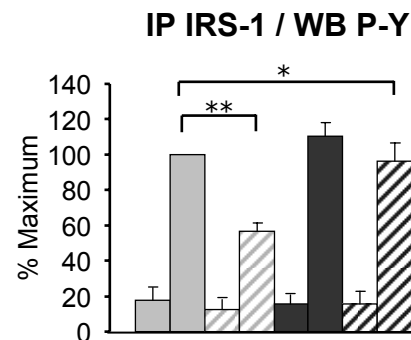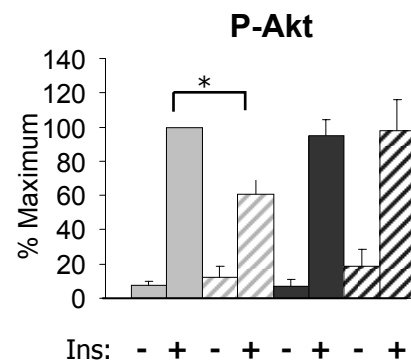**C.**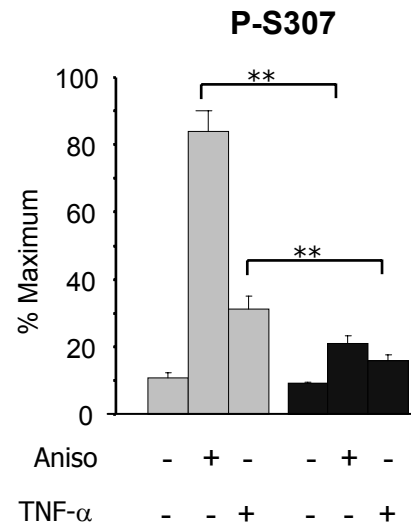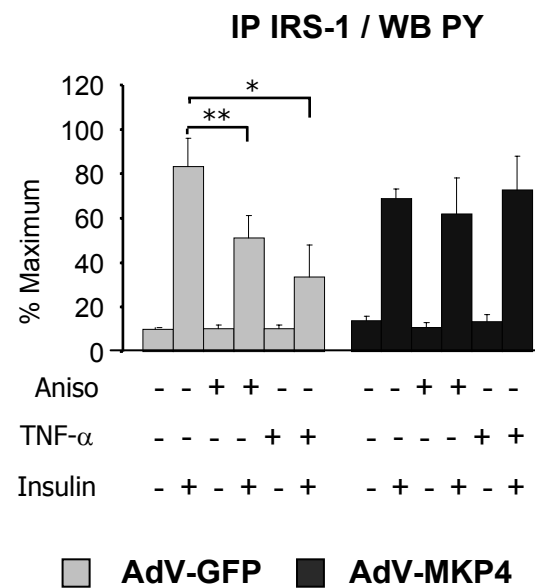

Supplement: pnas_0712275105_2.pdf [file pnas_0712275105_2.pdf]

**A**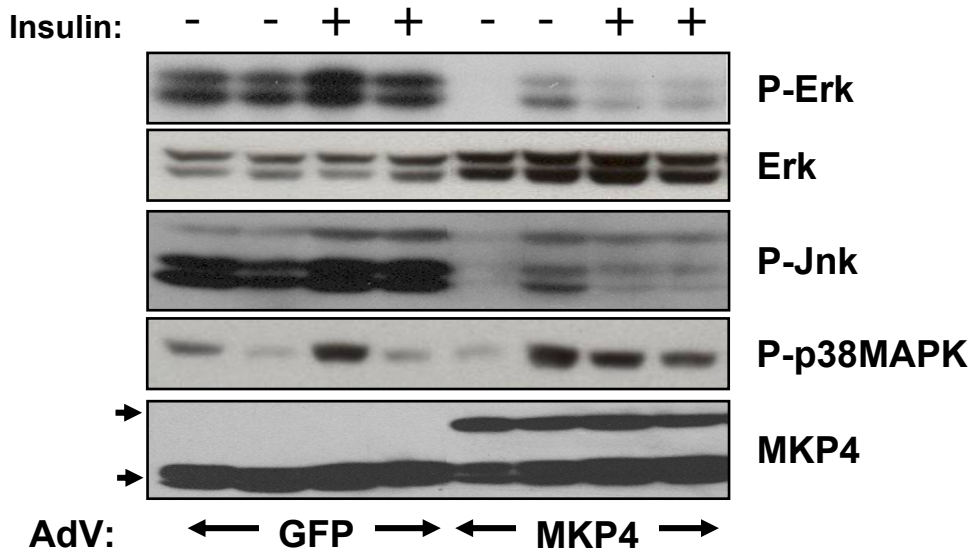**B**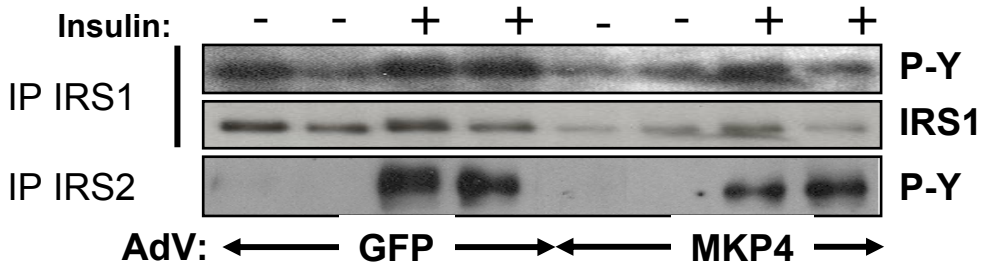**C**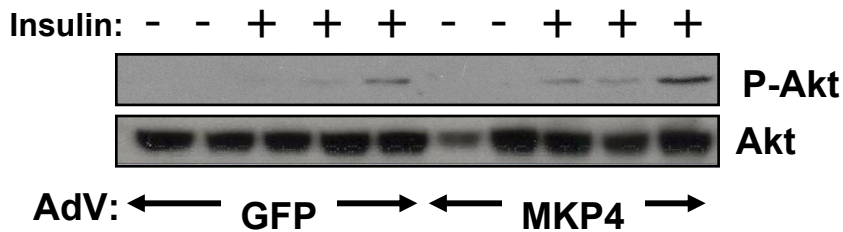

Supplement: pnas_0712275105_3.pdf [file pnas_0712275105_3.pdf]
